# Supplementary material for: Implication of liver enzymes on incident cardiovascular diseases and mortality: A nationwide population-based cohort study
Source: PubMed Central journal article supplement (PMC5830612; doi:10.1038/s41598-018-19700-8), 2018-02-28
Supplement: 41598_2018_19700_MOESM1_ESM.pdf [file 41598_2018_19700_MOESM1_ESM.pdf]

Original Article

# **Implication of liver enzymes on incident cardiovascular diseases and mortality: A nationwide population-based cohort study**

Kyung Mook Choi<sup>1</sup>, Kyungdo Han<sup>2</sup>, Sanghyun Park<sup>2</sup>, Hye Soo Chung<sup>1</sup>, Nam Hoon Kim<sup>1</sup>, Hye Jin Yoo<sup>1</sup>, Ji-A Seo<sup>1</sup>, Sin Gon Kim<sup>1</sup>, Nan Hee Kim<sup>1</sup>, Sei Hyun Baik<sup>1</sup>, Yong Gyu Park<sup>2\*</sup> and Seon Mee Kim<sup>3\*</sup>

<sup>1</sup>Division of Endocrinology and Metabolism, Department of Internal Medicine, College of Medicine, Korea University, Seoul, Korea; <sup>2</sup>Department of Biostatistics, College of Medicine, The Catholic University of Korea, Seoul, Korea; <sup>3</sup>Department of Family Medicine, College of Medicine, Korea University.

Supplementary Table 1. Hazard ratios and 95% confidence intervals for myocardial infarction, ischemic stroke, and death according to quartiles of liver enzymes in non-statin and statin group

| Non-statin group      |       |          |             |            |                    |          |             |            |                    |          |             |            |                    |
|-----------------------|-------|----------|-------------|------------|--------------------|----------|-------------|------------|--------------------|----------|-------------|------------|--------------------|
| Myocardial infarction |       |          |             |            | Ischemic stroke    |          |             |            | Death              |          |             |            |                    |
|                       | Event | Duration | IR          | HR(95% CI) | Event              | Duration | IR          | HR(95% CI) | Event              | Duration | IR          | HR(95% CI) |                    |
| ALT                   | Q1    | 33447    | 33689323.75 | 0.99       | 1(ref.)            | 42965    | 33679036.02 | 1.28       | 1(ref.)            | 133790   | 33759244.17 | 3.96       | 1(ref.)            |
|                       | Q2    | 34425    | 31039672.97 | 1.11       | 0.998(0.983-1.013) | 44781    | 31029352.45 | 1.44       | 1.015(1.001-1.028) | 107585   | 31113362.56 | 3.46       | 0.895(0.888-0.902) |
|                       | Q3    | 34724    | 28203468.24 | 1.23       | 1.037(1.021-1.052) | 44166    | 28194915.15 | 1.57       | 1.046(1.032-1.060) | 98118    | 28275754.22 | 3.47       | 0.927(0.919-0.934) |
|                       | Q4    | 38036    | 28697499.85 | 1.33       | 1.138(1.120-1.156) | 45954    | 28692485.11 | 1.6        | 1.103(1.087-1.118) | 117280   | 28776178.6  | 4.08       | 1.298(1.287-1.309) |
| AST                   | Q1    | 25800    | 31303149.81 | 0.82       | 1(ref.)            | 30567    | 31300569.11 | 0.98       | 1(ref.)            | 76393    | 31356501.48 | 2.44       | 1(ref.)            |
|                       | Q2    | 34534    | 33303831.25 | 1.04       | 0.984(0.969-1.001) | 41732    | 33299012.22 | 1.25       | 0.968(0.954-0.983) | 99786    | 33375492.95 | 2.99       | 0.920(0.912-0.929) |
|                       | Q3    | 37864    | 30952226.08 | 1.22       | 1.000(0.984-1.016) | 49102    | 30941296.28 | 1.59       | 0.988(0.973-1.002) | 113237   | 31032664.65 | 3.65       | 0.970(0.961-0.979) |
|                       | Q4    | 42434    | 26070757.66 | 1.63       | 1.112(1.094-1.130) | 56465    | 26054911.13 | 2.17       | 1.085(1.070-1.101) | 167357   | 26159880.46 | 6.40       | 1.421(1.409-1.433) |
| GTP                   | Q1    | 29849    | 33848369.86 | 0.88       | 1(ref.)            | 36284    | 33845293.42 | 1.07       | 1(ref.)            | 105630   | 33918254.45 | 3.11       | 1(ref.)            |
|                       | Q2    | 33274    | 32110943.24 | 1.04       | 1.079(1.062-1.096) | 41211    | 32102168.5  | 1.28       | 1.102(1.086-1.118) | 101162   | 32180860.78 | 3.14       | 1.051(1.042-1.060) |
|                       | Q3    | 35975    | 29063718.76 | 1.24       | 1.173(1.155-1.192) | 45315    | 29053603.02 | 1.56       | 1.214(1.197-1.231) | 102254   | 29135191.95 | 3.51       | 1.173(1.163-1.184) |
|                       | Q4    | 41534    | 26606932.94 | 1.56       | 1.331(1.310-1.353) | 55056    | 26594723.81 | 2.07       | 1.409(1.389-1.429) | 147727   | 26690232.36 | 5.53       | 1.791(1.775-1.806) |
| Statin group          |       |          |             |            |                    |          |             |            |                    |          |             |            |                    |
| Myocardial infarction |       |          |             |            | Ischemic stroke    |          |             |            | Death              |          |             |            |                    |
|                       | Event | Duration | IR          | HR(95% CI) | Event              | Duration | IR          | HR(95% CI) | Event              | Duration | IR          | HR(95% CI) |                    |
| ALT                   | Q1    | 3588     | 598728.23   | 5.99       | 1(ref.)            | 3594     | 599964.17   | 5.99       | 1(ref.)            | 8723     | 612122.09   | 14.25      | 1(ref.)            |
|                       | Q2    | 4991     | 1001047.82  | 4.99       | 0.918(0.879-0.959) | 4868     | 1003478.81  | 4.85       | 0.907(0.868-0.947) | 9666     | 1020969.59  | 9.47       | 0.825(0.801-0.849) |
|                       | Q3    | 6240     | 1416585.5   | 4.40       | 0.855(0.820-0.891) | 6074     | 1419837.89  | 4.28       | 0.866(0.830-0.903) | 11091    | 1442050.04  | 7.69       | 0.774(0.752-0.796) |
|                       | Q4    | 9627     | 2326296.39  | 4.14       | 0.878(0.843-0.914) | 9219     | 2333019.7   | 3.95       | 0.890(0.855-0.927) | 15372    | 2366458.39  | 6.50       | 0.824(0.802-0.848) |
| AST                   | Q1    | 3940     | 720531.71   | 5.47       | 1(ref.)            | 3810     | 722185.02   | 5.28       | 1(ref.)            | 7423     | 735745.81   | 10.09      | 1(ref.)            |

|     |    |       |            |      |                    |       |            |      |                    |       |            |      |                    |
|-----|----|-------|------------|------|--------------------|-------|------------|------|--------------------|-------|------------|------|--------------------|
|     | Q2 | 5249  | 1096878.69 | 4.79 | 0.901(0.865-0.939) | 4783  | 1100852.22 | 4.34 | 0.859(0.823-0.896) | 9217  | 1118068.07 | 8.24 | 0.853(0.827-0.880) |
|     | Q3 | 6666  | 1550128.91 | 4.30 | 0.856(0.823-0.891) | 6512  | 1553734.68 | 4.19 | 0.851(0.817-0.886) | 11635 | 1577542.75 | 7.38 | 0.843(0.818-0.868) |
|     | Q4 | 8591  | 1975118.62 | 4.35 | 0.873(0.840-0.907) | 8650  | 1979528.65 | 4.37 | 0.890(0.856-0.925) | 16577 | 2010243.47 | 8.25 | 0.984(0.957-1.012) |
|     | Q1 | 2994  | 615302.07  | 4.87 | 1(ref.)            | 2728  | 617998.83  | 4.41 | 1(ref.)            | 6043  | 627321.27  | 9.63 | 1(ref.)            |
| GTP | Q2 | 4670  | 993569.53  | 4.70 | 1.007(0.962-1.054) | 4333  | 996879.42  | 4.35 | 1.045(0.996-1.096) | 8648  | 1012375.05 | 8.54 | 1.013(0.980-1.047) |
|     | Q3 | 6706  | 1436217.16 | 4.67 | 1.048(1.003-1.095) | 6301  | 1441033.56 | 4.37 | 1.113(1.063-1.165) | 11470 | 1463888.8  | 7.84 | 1.058(1.025-1.092) |
|     | Q4 | 10076 | 2297569.18 | 4.39 | 1.074(1.029-1.121) | 10393 | 2300388.76 | 4.52 | 1.240(1.187-1.296) | 18691 | 2338014.98 | 7.99 | 1.312(1.272-1.353) |

IR, incidence rate per 1000

Hazard ratio was analyzed after adjusting for age, sex, body mass index, smoking, alcohol, exercise, diabetes, and hypertension.

Patients who are taking statin therapy during follow-up period are regarded as drop-out cases.
